# Supplementary material for: Jarosite-Rich Mineral Crust on Coastal Cliffs in Central Norway: Microstructural and Geochemical Investigations
Source: MDPI journal article supplement (doi:10.3390/min13010048), 2022-12-28
Supplement: s1 [file s1]

Archive with 1 entries (1 files):
- minerals-2041596-supplementary.pdf
